# Supplementary material for: Enhancing the thermoelectric performance of gamma-graphyne nanoribbons by introducing edge disorder
Source: Royal Society of Chemistry journal article supplement (doi:10.1039/c7cp08154e), 2018-01-01
Supplement: c7cp08154e1.pdf [file c7cp08154e1.pdf]

Supplemental Materials for

**Enhancing thermoelectric performance of gamma-graphyne  
nanoribbons by introducing edge disorder**

Xiao Cui, Tao Ouyang<sup>a)</sup>, Jin Li, Chaoyu He, Chao Tang<sup>a)</sup>, and Jianxin Zhong

Hunan Key Laboratory for Micro-Nano Energy Materials & Device and School of Physics and  
Optoelectronics, Xiangtan University, Xiangtan 411105, Hunan, China

---

<sup>a)</sup> Authors to whom correspondence should be addressed. Electronic addresses: ouyangtao@xtu.edu.cn and tang\_chao@xtu.edu.cn

## 1. Comparing between tight-binding results and density functional tight-binding method

To validate the reasonability of our results, we recalculate the thermoelectric properties of edge-disordered gamma-graphyne nanoribbons ( $\gamma$ -GYNR) by utilizing the density functional tight-binding method as implemented in the DFTB+ software<sup>1</sup>. It can be seen from figure. S1 that the thermoelectric figure of merit  $ZT$  of  $\gamma$ -GYNRs obtained from the TB parameters and DFTB+ software shares almost same value and similar trends with different edge disorder magnitudes. That is to say, the TB parameters employed in our calculation could be qualitatively extended to study the thermoelectric performance of edge-disordered  $\gamma$ -GYNRs.

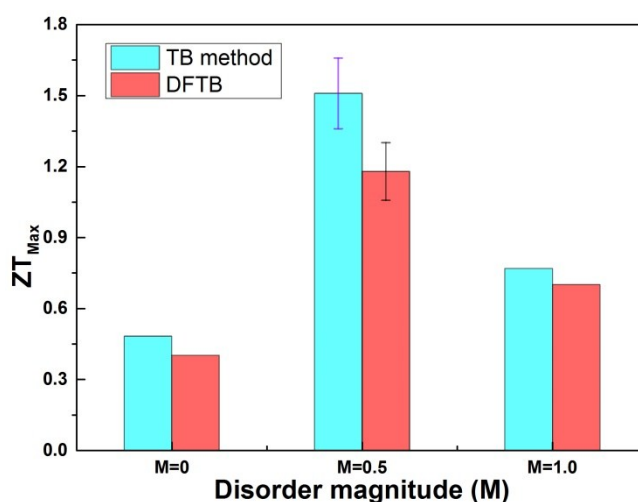

Figure S1. The room temperature maximum value of thermoelectric figure of merit  $ZT$  for  $\gamma$ -GYNR (width and length of central region is 1.41 and 13.92 nm) with different edge disorder magnitude.

## Reference

1. B. Aradi, B. Hourahine and T. Frauenheim, *The Journal of Physical Chemistry A*, 2007, **111**, 5678-5684.
